# Supplementary material for: Reliability, Knowledge Translation, and Implementability of the Spanish Version of the Hammersmith Infant Neurological Examination
Source: MDPI journal article supplement (doi:10.3390/healthcare12030380), 2024-02-01
Supplement: s1 [file s1]

# HAMMERSMITH INFANT NEUROLOGICAL EXAMINATION (v 07.07.17)

Name

Date of birth

Gestational age

Date of examination

Chronological age / Corrected age

Head circumference

| SUMMARY OF EXAMINATION                               |
|------------------------------------------------------|
| Global score (max 78)                                |
| Number of asymmetries                                |
| Behavioural score (not part of the optimality score) |

**Cranial nerve function** score (max 15)  
**Posture** score (max 18)  
**Movements** score (max 6)  
**Tone** score (max 24)  
**Reflexes and reactions** score (max 15)

## COMMENTS

(Throughout the exam, if a response is not optimal but not poor enough to score 1, give a score of 2)

## NEUROLOGICAL EXAMINATION

### ASSESSMENT OF CRANIAL NERVE FUNCTION

|                                                                                                                                    | score 3                                                   | 2 | score 1                                                        | score 0                                                      | score | Asymmetry / Comments |
|------------------------------------------------------------------------------------------------------------------------------------|-----------------------------------------------------------|---|----------------------------------------------------------------|--------------------------------------------------------------|-------|----------------------|
| <b>Facial appearance</b><br>(at rest and when crying or stimulated)                                                                | Smiles or reacts to stimuli by closing eyes and grimacing |   | Closes eyes but not tightly, poor facial expression            | Expressionless, does not react to stimuli                    |       |                      |
| <b>Eye movements</b>                                                                                                               | Normal conjugate eye movements                            |   | <b>Intermittent</b><br>Deviation of eyes or abnormal movements | <b>Continuous</b><br>Deviation of eyes or abnormal movements |       |                      |
| <b>Visual response</b><br>Test ability to follow a black/white target                                                              | Follows the target in a complete arc                      |   | Follows target in an incomplete or asymmetrical arc            | Does not follow the target                                   |       |                      |
| <b>Auditory response</b><br>Test the response to a rattle                                                                          | Reacts to stimuli from both sides                         |   | Doubtful reaction to stimuli or asymmetry of response          | No response                                                  |       |                      |
| <b>Sucking/swallowing</b><br>Watch infant suck on breast or bottle. If older, ask about feeding, assoc. cough, excessive dribbling | Good suck and swallowing                                  |   | Poor suck and/or swallow                                       | No sucking reflex, no swallowing                             |       |                      |

## ASSESSMENT OF POSTURE (note any asymmetries)

|                                          | score 3                                                                                                                                                                  | score 2                                                        | score 1                                                                                                                                               | score 0                                                                                                                                                                 | sc | Asymmetry / comments |
|------------------------------------------|--------------------------------------------------------------------------------------------------------------------------------------------------------------------------|----------------------------------------------------------------|-------------------------------------------------------------------------------------------------------------------------------------------------------|-------------------------------------------------------------------------------------------------------------------------------------------------------------------------|----|----------------------|
| <b>Head</b><br>in sitting                | <br>Straight; in midline                                                                |                                                                | <br>Slightly to side <i>or</i> backward <i>or</i> forward            | <br>Markedly to side <i>or</i> backward <i>or</i> forward                            |    |                      |
| <b>Trunk</b><br>in sitting               | <br>Straight                                                                            |                                                                | <br>Slightly curved or bent to side                                  | <br>Very rounded      rocketing back      bent sideways                               |    |                      |
| <b>Arms</b><br>at rest                   | In a neutral position, central straight or slightly bent                                                                                                                 |                                                                | <b>Slight</b><br>internal rotation <i>or</i> external rotation<br><br><b>Intermittent</b> dystonic posture                                            | <b>Marked</b><br>internal rotation <i>or</i> external rotation <i>or</i> dystonic posture<br>hemiplegic posture                                                         |    |                      |
| <b>Hands</b>                             | Hands open                                                                                                                                                               |                                                                | <b>Intermittent</b><br>adducted thumb <i>or</i> fisting                                                                                               | <b>Persistent</b><br>adducted thumb <i>or</i> fisting                                                                                                                   |    |                      |
| <b>Legs</b><br>in sitting                | Able to sit with a straight back and legs straight or slightly bent (long sitting)<br> |                                                                | Sit with straight back but knees bent at 15-20 °<br>                 | Unable to sit straight unless knees markedly bent (no long sitting)<br>              |    |                      |
| in supine and in standing                | Legs in neutral position straight or slightly bent                                                                                                                       | <b>Slight</b><br>internal rotation <i>or</i> external rotation | Internal rotation <i>or</i> external rotation at the hips                                                                                             | <b>Marked</b><br>internal rotation <i>or</i> external rotation <i>or</i> fixed extension or flexion or contractures at hips and knees                                   |    |                      |
| <b>Feet</b><br>in supine and in standing | Central in neutral position<br><br>Toes straight midway between flexion and extension                                                                                    |                                                                | <b>Slight</b><br>internal rotation <i>or</i> external rotation<br><br><b>Intermittent</b><br>Tendency to stand on tiptoes or toes up or curling under | <b>Marked</b><br>internal rotation <i>or</i> external rotation at the ankle<br><br><b>Persistent</b><br>Tendency to stand on tiptoes <i>or</i> toes up or curling under |    |                      |

## ASSESSMENT OF MOVEMENTS

|                                                                                                             | Score 3                       | Score 2 | Score 1                    | Score 0                                                                                                                                                                                                            | score | Asymmetry / comments |
|-------------------------------------------------------------------------------------------------------------|-------------------------------|---------|----------------------------|--------------------------------------------------------------------------------------------------------------------------------------------------------------------------------------------------------------------|-------|----------------------|
| <b>Quantity</b><br>Watch infant lying in supine                                                             | Normal                        |         | Excessive or sluggish      | Minimal or none                                                                                                                                                                                                    |       |                      |
| <b>Quality</b><br>Observe infant's spontaneous voluntary motor activity during the course of the assessment | Free, alternating, and smooth |         | Jerky<br><br>Slight tremor | <ul style="list-style-type: none"> <li>Cramped &amp; synchronous</li> <li>Extensor spasms</li> <li>Athetoid</li> <li>Ataxic</li> <li>Very tremulous</li> <li>Myoclonic spasm</li> <li>Dystonic movement</li> </ul> |       |                      |

## ASSESSMENT OF TONE

|                                                                                                                                                                                                 | Score 3                                                                                                                           | Score 2                                                                                                               | Score 1                                                                                                                                      | Score 0                                                                                                                                              | sc | Asym/Co |
|-------------------------------------------------------------------------------------------------------------------------------------------------------------------------------------------------|-----------------------------------------------------------------------------------------------------------------------------------|-----------------------------------------------------------------------------------------------------------------------|----------------------------------------------------------------------------------------------------------------------------------------------|------------------------------------------------------------------------------------------------------------------------------------------------------|----|---------|
| <b>Scarf sign</b><br>Take the infant's hand and pull the arm across the chest until there is resistance. Note the position of the elbow in relation to the midline.                             | Range:<br>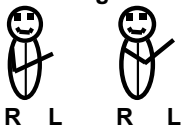                                       |                                                                                                                       |                                                             |                                                                   |    |         |
| <b>Passive shoulder elevation</b><br>Lift arm up alongside infant's head. Note resistance at shoulder and elbow.                                                                                | Resistance overcomeable<br>                      | Resistance difficult to overcome<br> | No resistance<br>                                           | Resistance, not overcomeable<br>                                  |    |         |
| <b>Pronation/supination</b><br>Steady the upper arm while pronating and supinating forearm, note resistance                                                                                     | Full pronation and supination, no resistance<br> |                                                                                                                       | Resistance to full pronation / supination overcomeable<br> | Full pronation and supination not possible, marked resistance<br> |    |         |
| <b>Hip adductors</b><br>With both the infant's legs extended, abduct them as far as possible. The angle formed by the legs is noted.                                                            | Range: 150-80°<br>                               | 150-160°<br>                         | >170°<br>                                                   | <80°<br>                                                          |    |         |
| <b>Popliteal angle</b><br>Keeping the infant's bottom on the bed, flex both hips onto the abdomen, then extend the knees until there is resistance. Note the angle between upper and lower leg. | Range: 150°-100°<br>                             | 150-160°<br>                         | ~90° or > 170°<br>                                         | <80°<br>                                                          |    |         |
| <b>Ankle dorsiflexion</b><br>With knee extended, dorsiflex the ankle. Note the angle between foot and leg.                                                                                      | Range: 30°-85°<br>                              | 20-30°<br>                          | <20° or 90°<br>                                           | > 90°<br>                                                        |    |         |
| <b>Pull to sit</b><br>Pull infant to sit by the wrists. (support head if necessary)                                                                                                             |                                                |                                                                                                                       |                                                           |                                                                 |    |         |
| <b>Ventral suspension</b><br>Hold infant horizontally around trunk in ventral suspension; note position of back, limbs and head.                                                                |                                                |                                                                                                                       |                                                           |                                                                 |    |         |

## REFLEXES AND REACTIONS

|                                                                                                                                                                            | Score 3                                                                             | Score 2                                                                             | Score 1                                                                              | Score 0                                                                               | sc | Asym / Co |
|----------------------------------------------------------------------------------------------------------------------------------------------------------------------------|-------------------------------------------------------------------------------------|-------------------------------------------------------------------------------------|--------------------------------------------------------------------------------------|---------------------------------------------------------------------------------------|----|-----------|
| <b>Arm protection</b><br>Pull the infant by one arm from the supine position (steady the contralateral hip) and note the reaction of arm on opposite side.                 | 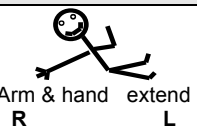 |                                                                                     |  |  |    |           |
| <b>Vertical suspension</b><br>hold infant under axilla making sure legs do not touch any surface – you may "tickle" feet to stimulate kicking.                             |  |                                                                                     |  |  |    |           |
| <b>Lateral tilting</b> (describe side up). Hold infant up vertically near to hips and tilt sideways towards the horizontal. Note response of trunk, spine, limbs and head. |  |  |  |  |    |           |
| <b>Forward parachute</b> Hold infant up vertically and quickly tilt forwards. Note reaction /symmetry of arm responses,                                                    |  |                                                                                     |   |                                                                                       |    |           |
| <b>Tendon Reflexes</b><br>Have child relaxed, sitting or lying – use small hammer                                                                                          | Easily elicitable<br>biceps knee ankle                                              | Mildly brisk<br>bicep knee ankle                                                    | Brisk<br>biceps knee ankle                                                           | Clonus or absent<br>biceps knee ankle                                                 |    |           |

## SECTION 2 MOTOR MILESTONES (not scored; note asymmetries)

|                                             |                                                 |                                                                                                                           |                                                                                                                             |                                                                                                                                |                                                                                                                                      |                                                           |
|---------------------------------------------|-------------------------------------------------|---------------------------------------------------------------------------------------------------------------------------|-----------------------------------------------------------------------------------------------------------------------------|--------------------------------------------------------------------------------------------------------------------------------|--------------------------------------------------------------------------------------------------------------------------------------|-----------------------------------------------------------|
| <b>Head control</b>                         | Unable to maintain head upright<br>normal to 3m | Wobbles<br>normal up to 4m                                                                                                | Maintained upright all the time<br>normal from 5m                                                                           |                                                                                                                                |                                                                                                                                      | <b>Please note age at which maximum skill is achieved</b> |
| <b>Sitting</b>                              | Cannot sit                                      | With support at hips<br><br>normal at 4m | Props<br><br>normal at 6m                  | Stable sit<br><br>normal at 7-8m              | Pivots (rotates)<br><br>normal at 9m              | Observed:<br>Reported (age):                              |
| <b>Voluntary grasp – note side</b>          | No grasp                                        | Uses whole hand                                                                                                           | Index finger and thumb but immature grasp                                                                                   | Pincer grasp                                                                                                                   |                                                                                                                                      | Observed:<br>Reported (age):                              |
| <b>Ability to kick in supine</b>            | No kicking                                      | Kicks horizontally but legs do not lift                                                                                   | Upward (vertically)<br><br>normal at 3m    | Touches leg<br><br>normal at 4-5m             | Touches toes<br><br>normal at 5-6m                | Observed:<br>Reported (age):                              |
| <b>Rolling - note through which side(s)</b> | No rolling                                      | Rolling to side<br>normal at 4m                                                                                           | Prone to supine<br>normal at 6 m                                                                                            | Supine to prone<br>normal at 6 m                                                                                               |                                                                                                                                      | Observed:<br>Reported (age):                              |
| <b>Crawling - note if bottom shuffling</b>  | Does not lift head                              | On elbows<br><br>normal at 3m           | On outstretched hands<br><br>normal at 4m | Crawling flat on abdomen<br><br>normal at 8m | Crawling on hands and knees<br><br>normal at 10m | Observed:<br>Reported (age):                              |
| <b>Standing</b>                             | Does not support weight                         | Supports weight<br>normal at 4m                                                                                           | Stands with support<br>normal at 7m                                                                                         | Stands unaided<br>normal at 12m                                                                                                |                                                                                                                                      | Observed:<br>Reported (age):                              |
| <b>Walking</b>                              |                                                 | Bouncing<br>normal at 6m                                                                                                  | Cruising (walks holding on)<br>normal at 12m                                                                                | Walking independently<br>normal by 15m                                                                                         |                                                                                                                                      | Observed:<br>Reported (age):                              |

## SECTION 3 BEHAVIOUR (not scored)

|                           | 1                         | 2                            | 3                         | 4                        | 5                 | 6                  | Comment |
|---------------------------|---------------------------|------------------------------|---------------------------|--------------------------|-------------------|--------------------|---------|
| <b>Conscious state</b>    | Unrousable                | Drowsy                       | Sleep but wakes easily    | Awake but no interest    | Loses interest    | Maintains interest |         |
| <b>Emotional state</b>    | Irritable, not consolable | Irritable, carer can console | Irritable when approached | Neither happy or unhappy | Happy and smiling |                    |         |
| <b>Social orientation</b> | Avoiding, withdrawn       | Hesitant                     | Accepts approach          | Friendly                 |                   |                    |         |

For enquiries about the Hammersmith Infant Neurological examination, please contact either Prof Frances Cowan [f.cowan@imperial.ac.uk](mailto:f.cowan@imperial.ac.uk), Prof Leena Haataja [leena.haataja@hus.fi](mailto:leena.haataja@hus.fi) or Prof Eugenio Mercuri [eumercuri@gmail.com](mailto:eumercuri@gmail.com)
